# Supplementary material
Source: publisher site journal article supplement (https://www.dovepress.com/article/422122)
Supplement: Supplementary file 1 [file get_supplementary_file.php]

**Table S1:** Comparative table of all versions of the BHAB questionnaire*.

| **Original**  **items** |  | **Translation** | |  | **Translation committee**** |  | **Back translation** | |  | **Expert**  **Committee***** |
| --- | --- | --- | --- | --- | --- | --- | --- | --- | --- | --- |
|  | Translator 1 | Translator 2 |  |  | Translator 4 | Translator 5 |  |
| **a1.** Nurses should introduce themselves personally and greet patients by name |  | **a1.** Os enf.os devem se apresentar pessoalmente e tratar o cliente pelo nome | **a1**. Os enf.os devem apresentar-se pessoalmente e cumprimentar os pacientes pelo nome |  | a**1.** Os enf.os devem apresentar-se e tratar os clientes s pelo nome |  | a**1.** Nurses must introduce themselves and address patients by their name. | **a1.** Nurses should introduce themselves and address patients by their name |  | **a1.** Os enf.os devem apresentar-se e tratar os clientes pelo nome |
| **a2.** Nurses need to make eye contact with the patient |  | **a2.** Os enf.os necessitam de ter contato visual com o cliente | **a2.** Os enf.os necessitam de fazer contacto visual com o paciente |  | **a2.** Os enf.os necessitam de ter contacto visual com o cliente |  | **a2.** Nurses need to make eye contact with the patient. | **a2.** Nurses need to make eye contact with the patient |  | **a2.** É necessário que os enf.os estabeleçam contacto visual com o cliente |
| **a3.** Nurses should allow the patient to easily hear and see the handover |  | **a3.** Os enf.os devem permitir que o cliente ouça e veja com facilidade a passagem de turno | **a3.** Os enf.os devem permitir que o paciente oiça e veja facilmente a transferência |  | **a3.** Os enf.os devem permitir que o cliente ouça e veja com facilidade a passagem de turno |  | **a3.** Nurses must allow the patient to hear and see the shift change easily. | **a3.** Nurses should enable the patient to hear or see the handover easily |  | **a3.** Os enf.os devem permitir que o cliente ouça e veja com facilidade a passagem de turno |
| **a4.** There is no need to involve  patients in the discussion |  | **a4.** Não existe necessidade da  participação dos clientes na discussão | **a4.** Não há necessidade de envolver os pacientes na discussão |  | **a4.** Não há necessidade de envolver os clientes na discussão |  | **a4.** There is no need to involve  patients in the discussion | **a4.** There is no need to involve  patients in discussions |  | **a4.** Não há necessidade de  envolver os clientes na discussão da passagem de turno |
| **a5.** Incoming nurses should ask |  | **a5.** Os enf.os que entram de turno | **a5.** Os enf.os que entram ao serviço |  | **a5.** Os enf.os que entram de turno |  | **a5.** Nurses starting a shift | **a5.** Nurses coming onto their shift |  | **a5.** Os enf.os, que entram de turno, |
| for information about patient progress on the past shift |  | devem solicitar informação sobre o estado do cliente no turno anterior | devem pedir informações sobre a evolução do estado do paciente no turno anterior |  | devem pedir informações sobre a evolução do estado  do cliente no turno anterior |  | must ask for information about developments in the patient’s condition  during the previous shift | should ask about any changes in the patient’s condition since the previous shift |  | devem pedir informações sobre a evolução do estado do cliente, no turno anterior |
| **a6.** Outgoing nurses should ask incoming nurses for clarification and confirmation of information discussed |  | **a6.** Os enf.os que saem de turno devem clarificar e confirmar a informação discutida com os enf.os que entram de turno | **a6.** Os enf.os que estão de saída do serviço devem pedir aos enf.os que entram ao serviço para esclarecer e confirmar as informações discutidas |  | **a6.** Os enf.os que estão de saída de turno devem pedir aos enf.os que entram para esclarecer e confirmar as informações discutidas |  | **a6.** Nurses leaving a shift must ask the nurses coming on to the next shift to clarify and confirm the information discussed | **a6.** Nurses coming off their shift should ask nurses coming on to clarify and confirm the information discussed |  | **a6.** Os enf.os, que estão de saída de turno, devem pedir aos enf.os que entram, para validarem as informações discutidas |
| **a7.** Nurses can speak about patients without using their names (in other words, it is ok if nurses only say “he/she/they” or use just descriptor terms like “40‐year‐old male”) |  | **a7.** Os enf.os podem falar dos clientes sem usar os seus nomes (por outras palavras, está correto os enf.os dizerem “ele/ela/eles/elas ou usarem termos como “homem de 40 anos de idade”) | **a7.** Os enf.os podem falar dos pacientes sem usar os seus nomes (por outras palavras, não importa se os enf.os dizerem apenas "ele/ela" ou usarem apenas termos descritivos tais como "homem de 40 anos") |  | **a7.** Os enf.os podem falar dos clientes sem usar os seus nomes (está correto os enf.os referirem-se aos clientes como “ele/ela/eles/elas” ou usarem termos descritivos como “homem de 40 anos de idade”) |  | **a7.** Nurses may talk about patients without using their names (it is appropriate for nurses to refer to patients as “he/him; she/her; they/them” or to use descriptive  terms such as “40-year old man” | **a7.** Nurses may talk about patients without using their names (it is ok for nurses to refer to patients as “he/she/they” or use descriptive terms such as “40-year-old man”) |  | **a7.** Os enf.os podem falar dos clientes sem usar os seus nomes (está correto os enf.os referirem-se aos clientes como “ele/ela” ou usar, em termos descritivos, “homem de 40 anos de idade”) |
|  |  |  |  |  |  |  |  |  |  |  |
| **a8.** Nurses need to listen to patients |  | **a8.** Os enf.os devem ouvir os clientes | **a8.** Os enf.os necessitam de escutar os pacientes |  | **a8.** Os enf.os devem escutar os clientes |  | **a8.** Nurses must listen to patients | **a8.** Nurses must listen to patients |  | **a8.** É necessário que os enf.os escutem os clientes |
|  |  |  |  |  |  |  |  |  |  |  |
| **a9.** Nurses need to react to patients’ comments and questions |  | **a9.** Os enf.os devem responder às questões e comentários dos clientes | **a9.** Os enf.os precisam de reagir aos comentários e  questões dos  pacientes |  | **a9.** Os enf.os necessitam de responder às questões e  comentários dos clients |  | **a9.** Nurses need to respond to patients’ questions and comments | **a9.** Nurses need to respond to patients’  questions and comments |  | **a9.** É necessário que os enf.os respondam às questões e  comentários dos clientes |
| **a10.** There is no need for nurses to use nonverbal cues (for example, eye contact, touch or nodding) with the patient |  | **a10.** Os enf.os não têm necessidade de usar a comunicação não verbal (por exemplo contacto visual, toque ou aceno) com o cliente | **a10.** Não há necessidade de os enf.os utilizarem sinais não verbais (por exemplo, contacto visual, o toque ou o aceno de cabeça) com o paciente |  | **a10.** Os enf.os não têm necessidade de usar a comunicação não verbal (por exemplo, contacto visual, toque ou aceno) com o cliente |  | **a10.** Nurses do not need to use non-verbal communication (for example, eye contact, touch, or gestures) with the patient | **a10.** Nurses do not need to use non-verbal communication (for example, eye contact, touch or nodding) with the patient |  | **a10.** Não há necessidade de os enf.os usarem a comunicação não verbal (por exemplo, contacto visual, toque ou aceno de cabeça) com o cliente |
|  |  |  |  |  |  |  |  |  |  |  |
| **a11.** Nurses should look for, and be sensitive to, patients’ feelings during the handover |  | **a11.** Os enf.os devem ser sensíveis e estar atentos aos sentimentos dos clientes durante a | **a11.** Os enf.os devem procurar e ser sensíveis aos sentimentos dos pacientes durante a transferência |  | **a11.** Os enf.os devem estar atentos e ser sensíveis aos sentimentos dos clientes durante a |  | **a11.** Nurses must be careful and be sensitive to patients’ feelings during the shift change | **a11.** Nurses should be attentive and sensitive to patients’ feelings during a handover |  | **a11.** Os enf.os devem estar atentos e ser sensíveis aos sentimentos dos clientes durante a |
|  |  | passagem de turno |  |  | passagem de turno |  |  |  |  | passagem de turno |
|  |  |  |  |  |  |  |  |  |  |  |
| **a12.** Nurses need to be aware of particular patient  concerns and mark these in the notes |  | **a12.** Os enf.os devem estar  atentos às preocupações de cada cliente e salientá-las nos  registos de enfermagem | **a12.** Os enf.os necessitam de  estar conscientes das preocupações particulares dos pacientes e assinalá-las nas notas |  | **a12.** Os enf.os devem estar  atentos às preocupações de cada cliente e salientá-las nos registos de enfermagem |  | **a12.** Nurses must be attentive to each patient’s  concerns and point them out in the nursing records | **a12.** Nurses should be attentive to each patient’s concerns  and highlight them in the nursing records |  | **a12.** É necessário que os enf.os estejam atentos às  preocupações específicas do cliente e que as registem nos registos de enfermagem |
| **a13.** It is acceptable to use personal examples or humour in the handover discussion |  | **a13.** É aceitável usar exemplos pessoais e recorrer ao humor durante a passagem de turno | **a13.** É aceitável usar exemplos pessoais ou humor na discussão da transferência |  | **a13.** É aceitável usar exemplos pessoais ou humor na discussão da passagem de turno |  | **a13.** It is acceptable to use personal examples or humour in the shift-change discussion | **a13.** It is acceptable to use personal examples or humour when discussing the handover |  | **a13.** É aceitável usar exemplos pessoais ou humor na discussão da passagem de turno |
| **a14.** Nurses should be sensitive to cross‐generational and cultural differences in the discussion |  | **a14.** Os enf.os devem ser sensíveis às diferenças de gerações e culturais durante a discussão | **a14.** Os enf.os devem ser sensíveis às diferenças inter-geracionais e culturais na discussão |  | **a14.** Os enf.os devem ser sensíveis às diferenças inter-geracionais e culturais na discussão |  | **a14.** Nurses must be sensitive to inter-generational and cultural differences in the discussion | **a14.** Nurses must be sensitive to inter-generational and cultural differences in their discussion |  | **a14.** Os enf.os devem ser sensíveis às diferenças inter-geracionais e culturais na discussão da passagem de turno |
| **a15.** Outgoing nurses should begin the handover by identifying the  patient, his/her |  | **a15.** Os enf.os que saem de turno devem iniciar a passagem de turno identificando | **a15.** Os enf.os que estão de saída do serviço devem começar a transferência, |  | **a15.** Os enf.os que estão de saída de turno devem começar a passagem de |  | **a15.** Nurses who are leaving a shift must start the shift change by identifying the | **a15.** Nurses coming off their shift should start the handover by  identifying the |  | **a15.** Os enf.os que estão de saída de turno devem iniciar a passagem  de turno |
| clinician and the reason why the patient is in hospital |  | o cliente, o médico assistente e a razão clínica do internamento do cliente no hospital | identificando o paciente, o seu médico e a razão pela qual o cliente está no hospital |  | turno identificando o cliente, o seu médico e a razão pela qual o cliente está no hospital |  | patient, his/her doctor, and the reason why the patient is in hospital | patient, his or her doctor and the reason why the patient has been admitted |  | identificando o cliente, o seu médico e a razão pela qual está no hospital |
|  |  |  |  |  |  |  |  |  |  |  |
| **a16.** Outgoing nurses need to explain the patient's presenting condition |  | **a16.** Os enf.os que saem de turno devem explicar ao cliente a sua presente condição | **a16.** Os enf.os que estão de saída do serviço necessitam de explicar o quadro clínico de apresentação do paciente |  | **a16.** Os enf.os que estão de saída de turno devem explicar a presente condição do cliente |  | **a16.** Nurses who are leaving a shift must explain the patient’s apparent clinical condition | **a16.** Nurses who are coming off their shift should explain the patient’s clinical picture |  | **a16.** É necessário que os enf.os que estão de saída de turno expliquem o estado clínico atual do cliente |
|  |  |  |  |  |  |  |  |  |  |  |
| **a17.** It is not necessary for nurses to refer to the patient's medical notes |  | **a17.** Os enf.os não têm necessidade de informar o cliente das suas notas médicas | **a17.** Não é necessário que os enf.os consultem as notas médicas do paciente |  | **a17.** Os enf.os não têm necessidade de se referirem aos registos médicos do cliente |  | **a17.** Nurses do not need to refer to the patient’s medical records | **a17.** Nurses do not need to refer to the patient’s clinical records |  | **a17.** Não há necessidade de os enf.os consultarem os registos clínicos do cliente |
| **a18.** Outgoing nurses need to explain the treatment plan and what incoming nurses should watch for on the next shift |  | **a18.** Os enf.os que saem de turno devem explicar aos enf.os que entram de turno o plano de cuidados e as necessidades de observação para o turno seguinte | **a18.** Os enf.os que estão de saída do serviço necessitam de explicar o plano de tratamento e o que os enf.os que entram ao serviço devem ter em atenção no próximo turno |  | **a18.** Os enf.os que saem de turno necessitam de explicar o plano de cuidados e o que os enf.os devem ter em atenção no próximo turno |  | **a18.** Nurses who are leaving the shift need to explain the care plan and what the nurses on the next shift must keep in mind | **a18.** Nurses coming off their shift need to explain the care plan and what their colleagues should look out for on the next shift |  | **a18.** É necessário que os enf.os que saem de turno, expliquem o plano de cuidados e o que os enf.os que entram, devem monitorizar no turno |
|  |  |  |  |  |  |  |  |  |  |  |
| **c1.** I greet patients and relatives by name |  | **c1.** Trato os clientes e familiares pelo nome | **c1.** Saúdo os pacientes e familiares pelo nome |  | **c1.** Trato os doentes e familiares pelo nome |  | **c1.** I address the patients and their relatives by name | **c1.** I address patients and their family by their name |  | **c1.** Trato os clientes e familiares pelo nome |
| **c2.** I stand in a position that allows the patient |  | **c2.** Coloco-me numa local que permite ao | **c2.** Permaneço numa posição que permite ao |  | **c2.** Coloco-me onde o cliente consiga ouvir, |  | **c2.** I position myself where the patient can hear, | **c2.** I position myself where the patient can hear, |  | **c2.** Coloco-me numa posição que permita |
| to easily hear, see and contribute to the handover |  | cliente ouvir, ver e contribuir para a passagem de turno | paciente ouvir, ver e contribuir facilmente para a transferência |  | ver e contribuir para a passagem de turno |  | see, and contribute to the shift change | see and contribute to the handover |  | facilmente ao cliente ouvir, ver e contribuir para a passagem de turno |
| **c3.** I ask patients for input, clarification and confirmation on their medical information |  | **c3.** Questiono os clientes para melhorar, confirmar e clarificar a sua informação médica | **c3.** Peço aos pacientes que nos forneçam o seu contributo, esclarecimentos e confirmação sobre a sua informação médica |  | **c3.** Peço aos clientes que forneçam o seu contributo, esclarecimentos e confirmação sobre a sua informação médica |  | **c3.** I ask patients to provide contributions, clarifications, and their medical information | **c3.** I ask patients to contribute, clarify and confirm their medical details  confirmation of |  | **c3.** Peço aos clientes que contribuam, esclareçam e confirmem a informação acerca da sua situação clínica |
| **c4.** As an outgoing nurse, I introduce myself and each member of the incoming team |  | **c4.** Como enf.o sai de turno, apresento-me a cada elemento da equipa do turno seguinte | **c4.** Sendo o enf.o que estou de saída do serviço, apresento-me a mim próprio e a cada membro da equipa que entra ao serviço |  | **c4.** Como enf.o que sai de turno apresento-me a cada elemento da equipa do turno seguinte |  | **c4.** As a nurse leaving the shift, I introduce myself to each member of the team for the next shift | **c4.** As a nurse coming off my shift I introduce myself to every member of the team on the next shift |  | **c4.** Como enf.o que sai de turno, apresento o cliente a cada elemento da equipa que entra de turno |
|  |  |  |  |  |  |  |  |  |  |  |
| **c5.** As an outgoing nurse, I check that incoming nurses understand and agree with information given during handover |  | **c5.** Como enf.o que sai de turno, valido com os enf.os que entram de turno se compreendem e concordam com a informação transmitida durante a passagem de turno | **c5.** Sendo o enf.o que estou de saída do serviço, verifico que os enf.os que entram ao serviço compreendem e estão de acordo com a informação dada durante a transferência |  | **c5.** Como enf.o que sai de turno, verifico que os enf.os que saem compreendem e estão de acordo com a informação dada durante a passagem de turno |  | **c5.** As a nurse leaving the shift, I check that the nurses who are leaving understand and agree with the information given during the shift change | **c5.** As a nurse coming off my shift, I check that the outgoing nurses understand and agree with the information given during the handover |  | **c5.** Como enf.o que sai de turno, valido se os enf.os que entram, compreendem e estão de acordo com a informação partilhada, durante a passagem de turno |
|  |  |  |  |  |  |  |  |  |  |  |
| **c6.** I refer to patients only saying (“he/she/they”) or descriptor terms (like “40‐year‐old male”) |  | **c6.** Refiro-me os clientes apenas por “ele/ela/eles/elas” ou por uma descrição como “homem de 40 anos de idade” | **c6.** Refiro-me a pacientes apenas dizendo ("ele/ela") ou termos descritivos (como "homem de 40 anos") |  | **c6.** Refiro-me aos clientes apenas como (“ele/ela”) ou por termos descritivos (como “homem de 40 anos”) |  | **c6.** I refer to patients only as (“him/he” or “her/she”) or by descriptive terms (such as “40-year old man”) | **c6.** I refer to the patients only as (“he/she”) or by descriptive terms (such as “40-year-old man”) |  | **c6.** Refiro-me aos clientes, apenas, como “ele/ela” ou, por termos descritivos “homem de 40 anos” |
| **c7.** I listen to patients and react to their comments and questions |  | **c7.** Escuto os clientes e respondo aos seus comentários e questões | **c7.** Escuto os pacientes e reajo aos seus comentários e perguntas |  | **c7.** Escuto os clientes e respondo aos seus comentários e questões |  | **c7.** I listen to patients and I respond to their comments and questions | **c7.** I listen to patients and respond to their comments and questions |  | **c7.** Escuto os clientes e respondo aos seus comentários e questões |
| **c8.** There is no need to attend to patients’ feelings during the handover |  | **c8.** Durante a passagem de turno não é necessário estar atento aos sentimentos dos | **c8.** Não há necessidade de ter em atenção os sentimentos dos clientes durante a transferência |  | **c8.** Não há necessidade de estar atento aos sentimentos dos clientes durante a passagem de |  | **c8.** There is no need to be attentive to patients’ feelings during the shift change | **c8.** There is no need to be attentive to patients’ feelings during a handover |  | **c8.** Não há necessidade de prestar atenção aos sentimentos dos clientes, durante a |
|  |  | clientes |  |  | turno |  |  |  |  | passagem de turno |
|  |  |  |  |  |  |  |  |  |  |  |
| **c9.** I write down patient concerns in the notes |  | **c9.** Nos registos de enfermagem escrevo todas as preocupações do cliente | **c9.** Aponto as preocupações dos pacientes nas notas |  | **c9.** Nos registos de enfermagem anoto as preocupações dos clientes |  | **c9.** In the nursing records, I note the patients’ concerns | **c9.** In the nursing records, I note down patients’ concerns |  | **c9.** Anoto as preocupações dos clientes nos registos de enfermagem |
| **c10.** I am sensitive to cross‐generational and cultural differences in the discussion |  | **c10.** Nas discussões estou sensível às diferenças geracionais e culturais | **c10.** Sou sensível às diferenças inter-geracionais e culturais na discussão |  | **c10.** Sou sensível às diferenças inter-geracionais e culturais na discussão |  | **c10.** I am sensitive to inter-generational and cultural differences in the discussion | **c10.** I am sensitive to inter-generational and cultural differences in discussions |  | **c10.** Sou sensível às diferenças inter-geracionais e culturais na discussão da passagem de turno. |
| **c11.** As an outgoing nurse, I begin the handover by identifying the patient, his/her clinician and the reason why the patient is in hospital |  | **c11.** Como enf.o que sai de turno, inicio a passagem de turno identificando o cliente, o médico assistente e a razão clínica do  internamento do cliente no hospital | **c11.** Sendo o enf.o que estou de saída do serviço, começo a transferência, identificando o paciente, o seu médico e a razão pela qual o cliente está no hospital |  | **c11.** Sendo o enf.o que está de saída, começo a passagem de turno identificando o cliente, o seu médico e a razão pela qual está no hospital |  | **c11.** Being the nurse who is leaving, I start the shift change identifying the patient, his/her doctor, and the reason why s/he is in hospital | **c11.** As a nurse coming off my shift, I start the handover by identifying the patient, their doctor and the reason why they have been admitted |  | **c11.** Como enf.o que está de saída, início a passagem de turno identificando o cliente, o seu médico e a razão pela qual está no hospital |
|  |  |  |  |  |  |  |  |  |  |  |
| **c12.** As an outgoing nurse, I explain the presenting condition and how the patient has |  | **c12.** Como enf.o que sai de turno explico a presente condição do cliente e como este esteve | condição médica e como o paciente tem estado no meu turno evoluiu no meu turno |  | **c12.** Sendo o enf.o que está de saída de turno explico o quadro clínico de apresentação e como o cliente |  | **c12.** Being the nurse who is leaving the shift, I explain the apparent clinical condition and how | **c12.** As a nurse coming off my shift, I explain the clinical picture and how the patient’s condition has c |  | **c12.** Como enf.o que está de saída de turno, explico a evolução e o estado clínico atual do cliente |
| been doing on my shift |  | durante o meu turno |  |  |  |  | the patient has progressed during my shift | hanged during my shift |  |  |
| **c13.** During handover, I refer to the patient's medical notes |  | **c13.** Durante a passagem de turno, informo os clientes sobre as notas médicas | **c13.** Durante a transferência, refiro-me às notas médicas do paciente |  | **c13.** Durante a passagem de turno refiro-me às notas médicas dos clientes |  | **c13.** During the shift change, I refer to the patients’ medical notes | **c13.** During the handover, I refer to the patient’s notes |  | **c13.** Durante a passagem de turno, consulto os registos clínicos dos clientes |
| **c14.** As an outgoing nurse, I am explicit about the treatment plan and what incoming nurses should watch for |  | **c14.** Como enf.o que sai de turno, sou claro e explicito sobre o plano de cuidados e as necessidades de observação para o turno seguinte | **c14.** Sendo o enf.o que estou de saída do serviço, sou explícito sobre o plano de tratamento e sobre o que os enf.os que estão a entrar ao serviço devem ter em conta |  | **c14.** Sendo o enf.o que sai de turno, sou explícito sobre o plano de cuidados e sobre o que os enf.os que entram devem estar atentos |  | **c14.** Being the nurse who is leaving the shift, I am clear about the care plan and about that to which the nurses who are entering must be attentive. | **c14.** As a nurse coming off my shift, I am explicit about the care plan and about what the nurses coming onto their shift should look out for |  | **c14.** Como enf.o que está de saída de turno, sou explícito em relação ao plano de cuidados e ao que os enf.os devem monitorizar |

* Adapted from Slade D, Murray KA, Pun JKH, Eggins S. Nurses’ perceptions of mandatory bedside clinical handovers: An Australian hospital study. *J Nurs Manag*. 2019;27(1):161-171. © 2018 John Wiley & Sons Ltd; ** The translation committee included three translators (1, 2, and 3); *** Participated in the expert committee one coordinating nurse manager from the host institution, one monolingual nurse without experience in the NBH, one professional from the linguistics field, the translator 1, 2, 4, and 5, and one member from the research team (PC).

**Table S2:** Personal data of study participants.

| **Personal data** | | **Pre-test 1***  **(n=27)** | **Pre-test 2****  **(n=9)** |
| --- | --- | --- | --- |
| **Age** | | | |
|  | 20 – 29 years old  30-39  40-49  50-59  ≥ 60 | 7(26%)  16(59%)  4(15%)  -  - | -  2(22%)  3(33%)  4(45%)  - |
| **Professional experience at the hospital** | | | |
|  | ≤ 1 year  2 – 3 years  4 – 5 years  6 – 10 years  11 – 15 years  16 -20 years  ≥ 20 years | -  -  4(15%)  13(48%)  6(22%)  4(15%) | -  1(11%)  1(11%)  1(11%)  6(67%)  - |
| **Professional experience as a nurse** | | | |
|  | ≤ 1 year  2 – 3 years  4 – 5 years  6 – 10 years  11 – 15 years  16 -20 years  ≥ 20 years | -  -  5(19%)  12(44%)  7(26%)  3(11%)  - | -  -  -  -  1(11%)  1(11%)  7(78%) |
| **Gender** | | | |
|  | Female | 24(89%) | 7(78%) |
|  | Male | 3(11%) | 2(11%) |
| **Highest qualification** | |  |  |
|  | Bachelor  Postgraduate studies  Master | 14(52%)  9(33%)  4(15%) | 2(22%)  4(45%)  3(33%) |
| **Job category** | | | |
|  | Full-time | 27(100%) | 9(100%) |
|  | Part-time | - | - |
| **Supervise nurses** | | | |
|  | Yes | 13(48%) | 7(78%) |
|  | No | 14(52%) | 2(22%) |
| **Work service or unit** | | | |
|  | Intensive care Unit | 3(11%) | 1(11%) |
|  | Maternity | 3(11%) | 1(11%) |
|  | Operating Room | 3(11%) | 1(11%) |
|  | Hospital day surgery unit | 3(11%) | 1(11%) |
|  | Surgical ward | 3(11%) | 1(11%) |
|  | Medicine ward | 3(11%) | 1(11%) |
|  | Paediatric ward | 3(11%) | 1(11%) |
|  | Obstetric ward | 3(11%) | 1(11%) |
|  | Emergency service | 3(11%) | 1(11%) |

* Clarity of items BHAB of the Questionnaire; ** Relevance of items of the BHAB Questionnaire.
